# Supplementary material
Source: MDPI journal article supplement (https://www.mdpi.com/2311-7524/9/2/271)
Supplement: s1 [file s1]

**Table S1.** Composition of Murashige – Skoog's medium (MS) and its modifications, AMS and ABMS media.

| Component                                            | Amount in MS medium, mg L <sup>-1</sup> | Amount in AMS medium, mg L <sup>-1</sup> | Amount in AMS medium, mg L <sup>-1</sup> |
|------------------------------------------------------|-----------------------------------------|------------------------------------------|------------------------------------------|
| NH <sub>4</sub> NO <sub>3</sub>                      | 1650.00                                 | 825.00                                   | 825.00                                   |
| KNO <sub>3</sub>                                     | 1900.00                                 | 1900.00                                  | 950.00                                   |
| CaCl <sub>2</sub> · 2H <sub>2</sub> O                | 440.00                                  | 440.00                                   | 440.00                                   |
| MgSO <sub>4</sub> · 7H <sub>2</sub> O                | 370.00                                  | 370.00                                   | 370.00                                   |
| KH <sub>2</sub> PO <sub>4</sub>                      | 170.00                                  | 170.00                                   | 170.00                                   |
| NaH <sub>2</sub> PO <sub>4</sub> · H <sub>2</sub> O  | 170.00                                  | 170.00                                   | 170.00                                   |
| H <sub>3</sub> BO <sub>3</sub>                       | 6.20                                    | 6.20                                     | 6.20                                     |
| MnSO <sub>4</sub> · 4H <sub>2</sub> O                | 16.90                                   | 16.90                                    | 16.90                                    |
| ZnSO <sub>4</sub> · 7H <sub>2</sub> O                | 8.60                                    | 8.60                                     | 8.60                                     |
| KI                                                   | 0.83                                    | 0.83                                     | 0.83                                     |
| Na <sub>2</sub> MoO <sub>4</sub> · 2H <sub>2</sub> O | 0.25                                    | 0.25                                     | 0.25                                     |
| CoCl <sub>2</sub> · 6H <sub>2</sub> O                | 0.025                                   | 0.025                                    | 0.025                                    |
| CuSO <sub>4</sub> · 5H <sub>2</sub> O                | 0.025                                   | 0.025                                    | 0.025                                    |
| FeSO <sub>4</sub> · 7H <sub>2</sub> O                | 27.84                                   | 27.84                                    | 27.84                                    |
| Na <sub>2</sub> EDTA · 2H <sub>2</sub> O             | 37.26                                   | 37.26                                    | 37.26                                    |
| Mesoinosit                                           | 100.00                                  | 100.00                                   | 100.00                                   |
| Thiamine chloride*                                   | 0.50                                    | 0.50                                     | 0.50                                     |
| Pyridoxine chloride                                  | 0.50                                    | 0.50                                     | 0.50                                     |
| Nicotinic acid                                       | 0.50                                    | 0.50                                     | 0.50                                     |

\* 0.1 mg L<sup>-1</sup> is given by Murashige and Skoog (1962)

**Table S2.** Analysis of variance of the seed infection rate during in vitro establishment, as influenced by disinfection treatment.

| Source of variation | Sum of squares | DF | F-value | P-value |
|---------------------|----------------|----|---------|---------|
| Seed treatment      | 0.22           | 4  | 12.84   | <0.001  |
| Replication         | 0.01           | 3  | 0.79    | 0.52    |
| Residuals           | 0.05           | 12 |         |         |

**Table S3.** Analysis of variance of the origin on *Eryngium maritimum* in vitro germination rate.

| Source of variation | Sum of squares | DF | F-value | P-value |
|---------------------|----------------|----|---------|---------|
| Seed origin         | 6714.2         | 6  | 6.16    | 0.001   |
| Replicate           | 572.4          | 3  | 1.05    | 0.395   |
| Residuals           | 3271.9         | 18 |         |         |

**Table S4.** Analysis of variance of the impact of basal media composition and supplementation of media with various cytokinins and the concentration of the cytokinins on the number of regenerated axillary shoots.

| Source of variation | Sum of squares | DF  | F-value | P-value |
|---------------------|----------------|-----|---------|---------|
| PGR                 | 1205.00        | 4   | 124.93  | <0.001  |
| M                   | 19.31          | 2   | 4.00    | 0.02    |
| C                   | 0.00           | 1   | 0.00    | 0.99    |
| PGR : C             | 3.19           | 4   | 0.33    | 0.86    |
| PGR : M             | 27.04          | 8   | 1.40    | 0.19    |
| M : C               | 8.43           | 2   | 1.75    | 0.18    |
| Residuals           | 711.33         | 295 | -       | -       |

PGR—plant growth regulator; M—medium; C—cytokinin concentration

**Table S5.** Analysis of variance of the impact of basal media composition and supplementation of media with various cytokinins and the concentration of the cytokinins on the number of >16 mm long regenerated axillary shoots.

| Source of variation | Sum of squares | DF | F-value | P-value |
|---------------------|----------------|----|---------|---------|
| PGR                 | 28.10          | 1  | 4.79    | 0.03    |
| M                   | 41.82          | 2  | 3.56    | 0.03    |
| C                   | 8.57           | 1  | 1.46    | 0.23    |
| PGR : C             | 0.00           | 1  | 0.00    | 0.99    |
| PGR : M             | 14.28          | 2  | 1.23    | 0.30    |
| M : C               | 18.68          | 2  | 1.59    | 0.21    |
| Residuals           | 3271.9         | 18 |         |         |

PGR—plant growth regulator; M—medium; C—cytokinin concentration

**Table S6.** Analysis of variance of the impact of basal media composition and supplementation of media with various cytokinins and the concentration of the cytokinins on the number of 10 - 15 mm long regenerated axillary shoots.

| Source of variation | Sum of squares | DF | F-value | P-value |
|---------------------|----------------|----|---------|---------|
| PGR                 | 31.50          | 1  | 4.13    | 0.04    |
| M                   | 2.60           | 2  | 0.17    | 0.84    |
| C                   | 220.34         | 1  | 28.90   | <0.001  |
| PGR : C             | 8.19           | 1  | 8.19    | 0.30    |
| PGR : M             | 21.15          | 2  | 10.58   | 0.25    |
| M : C               | 4.13           | 2  | 2.06    | 0.76    |
| Residuals           | 724.23         | 95 | 7.62    |         |

PGR—plant growth regulator; M—medium; C—concentration

**Table S7.** Analysis of variance of the impact of basal media composition and supplementation of media with various cytokinins and the concentration of the cytokinins on the shoot basal callus size.

| Source of variation | Sum of squares | DF  | F-value | P-value |
|---------------------|----------------|-----|---------|---------|
| PGR                 | 169.55         | 4   | 409.2   | <0.001  |
| M                   | 2.21           | 2   | 10.7    | <0.001  |
| C                   | 14.73          | 1   | 142.2   | <0.001  |
| PGR : C             | 5.19           | 4   | 12.5    | <0.001  |
| PGR : M             | 1.38           | 8   | 1.7     | 0.106   |
| M : C               | 0.05           | 2   | 0.2     | 0.798   |
| Residuals           | 30.56          | 295 | -       | -       |

PGR—plant growth regulator; M—medium; C—cytokinin concentration

**Table S8.** Analysis of variance of the impact of media macrosalt content and concentration of indole-3-acetic on number of roots formed.

| Source of variation | Sum of squares | DF   | F-value | P-value |
|---------------------|----------------|------|---------|---------|
| M                   | 4.4            | 1    | 0.57    | 0.448   |
| C                   | 223.5          | 1    | 29.25   | <0.001  |
| M : C               | 63.6           | 1    | 8.32    | 0.004   |
| Residuals           | 11513          | 1507 | -       | -       |

M—medium; C—concentration of indole-3-acetic acid; DF—degrees of freedom

**Table S9.** Analysis of variance of the impact of mericlone on the root development of *E. maritimum* in vitro plantlets.

| Source of variation | Sum of squares | DF  | F-value | P-value |
|---------------------|----------------|-----|---------|---------|
| Mericlone           | 2.28           | 2   | 3.293   | 0.039   |
| Replication         | 1.55           | 3   | 1.497   | 0.216   |
| Residuals           | 87.6           | 253 | -       | -       |

**Table S10.** Analysis of variance of the impact of mericlone on the survival of *E. maritimum* in vitro plantlets 21 days after ex vitro transplantation.

| Source of variation | Sum of squares | DF  | F-value | P-value |
|---------------------|----------------|-----|---------|---------|
| Mericlone           | 0.005          | 2   | 0.296   | 0.744   |
| Replication         | 0.008          | 2   | 0.498   | 0.608   |
| Residuals           | 1.972          | 254 | -       | -       |

**Table S11.** Analysis of variance of the impact of mericlone on the number of leaves of *E. maritimum* in vitro plantlets 21 days after ex vitro transplantation.

| Source of variation | Sum of squares | DF  | F-value | P-value |
|---------------------|----------------|-----|---------|---------|
| Mericlone           | 16.7           | 2   | 2.115   | 0.125   |
| Replication         | 7.2            | 2   | 0.907   | 0.405   |
| Residuals           | 996.2          | 252 | -       | -       |

**Table S12.** Analysis of variance of the impact of artificial light quality on the number of leaves of *E. maritimum* ex vitro plantlets 21 days after ex vitro transplantation.

| Source of variation | Sum of squares | DF  | F-value | P-value |
|---------------------|----------------|-----|---------|---------|
| L                   | 11.2           | 2   | 1.305   | 0.274   |
| Residuals           | 707.1          | 165 | -       | -       |

L—artificial light quality; DF—degrees of freedom

**Table S13.** Analysis of variance of the impact of artificial light quality on the survival of *E. maritimum* ex vitro plantlets 21 days after ex vitro transplantation.

| Source of variation | Sum of squares | DF | F-value | P-value |
|---------------------|----------------|----|---------|---------|
| L                   | 1.55           | 2  | 0.3     | 0.746   |
| Residuals           | 30.94          | 12 | -       | -       |

L—artificial light quality; DF—degrees of freedom

**Table S14.** Analysis of variance of the impact of substrate on the number of leaves of the mericlone M2 plantlets 21 days after ex vitro transplantation.

| Source of variation | Sum of squares | DF  | F-value | P-value |
|---------------------|----------------|-----|---------|---------|
| S                   | 32.7           | 1   | 8.775   | 0.003   |
| Residuals           | 659.9          | 177 | -       | -       |

S—substrate; DF—degrees of freedom

**Table S15.** Analysis of variance of the impact of substrate on the plantlet survival of the mericlone M2 21 days after ex vitro transplantation.

| Source of variation | Sum of squares | DF | F-value | P-value |
|---------------------|----------------|----|---------|---------|
| L                   | 1.55           | 2  | 0.3     | 0.746   |
| Residuals           | 30.94          | 12 | -       | -       |

S—substrate; DF—degrees of freedom

**Table S16.** Analysis of variance of the impact of pot cell diameter on the survival of *E. maritimum* ex vitro plantlets 21 days after transplantation.

| Source of variation | Sum of squares | DF | F-value | P-value |
|---------------------|----------------|----|---------|---------|
| M                   | 2.8            | 1  | 0.153   | 0.705   |
| P                   | 1455.6         | 1  | 79.207  | <0.001  |
| R                   | 115.3          | 3  | 2.092   | 0.172   |
| M : P               | 0.1            | 1  | 0.007   | 0.937   |
| Residuals           | 165.4          | 9  | -       | -       |

M—mericlone; P—pot size; R—replication; DF—degrees of freedom

**Table S17.** Analysis of variance of the impact of pot cell diameter on the number of leaves of *E. maritimum* ex vitro plantlets 21 days after transplantation.

| Source of variation | Sum of squares | DF  | F-value | P-value |
|---------------------|----------------|-----|---------|---------|
| M                   | 415.3          | 1   | 39.765  | <0.001  |
| P                   | 658.6          | 1   | 63.060  | <0.001  |
| R                   | 24.1           | 3   | 0.768   | 0.513   |
| M : P               | 7.0            | 1   | 0.668   | 0.415   |
| Residuals           | 2715.6         | 260 | -       | -       |

M—mericlone; P—pot size; R— replication; DF—degrees of freedom

**Table S18.** Analysis of variance of the impact of planting date and cultivation length on field survival rate.

| Source of variation | Sum of squares | DF | F-value | P-value |
|---------------------|----------------|----|---------|---------|
| P                   | 7252           | 1  | 194.3   | <0.001  |
| T                   | 2269           | 1  | 60.8    | <0.001  |
| R                   | 122            | 2  | 1.633   | 0.271   |
| P : T               | 102            | 1  | 2.735   | 0.149   |
| Residuals           | 224            | 6  | -       | -       |

P—planting date; T—cultivation time; R—replication; DF—degrees of freedom

**Table S19.** Analysis of variance of the impact of mericlone and cultivation length on field survival rate.

| Source of variation | Sum of squares | DF | F-value | P-value |
|---------------------|----------------|----|---------|---------|
| M                   | 250.7          | 2  | 2.063   | 0.178   |
| T                   | 1467.0         | 1  | 24.143  | <0.001  |
| R                   | 104.9          | 2  | 0.863   | 0.451   |
| M : T               | 42.4           | 2  | 0.349   | 0.714   |
| Residuals           | 607.6          | 10 | -       | -       |

M—mericlone; T—cultivation time; R—replication; DF—degrees of freedom
